# Supplementary material for: Upconversion-luminescent/magnetic dual-functional sub-20 nm core–shell SrF2:Yb,Tm@CaF2:Gd heteronanoparticles
Source: Royal Society of Chemistry journal article supplement (doi:10.1039/c6dt00237d), 2016-01-01
Supplement: c6dt00237d1.pdf [file c6dt00237d1.pdf]

**Electronic Supplementary Information(ESI)**

**Upconversion-luminescent/magnetic dual-functional sub-20-nm  
core-shell SrF<sub>2</sub>:Yb,Tm@CaF<sub>2</sub>:Gd heteronanoparticles**

*Ai-Hua Li, <sup>\*a</sup> Mengyun Lü,<sup>a</sup> Jun Yang,<sup>a</sup> Lin Chen,<sup>b</sup> Xiaohong Cui<sup>b</sup> and Zhijun Sun<sup>\*a</sup>*

<sup>a</sup> Department of Physics, Xiamen University, Xiamen 361005, P R China

<sup>b</sup> Department of Electronic Science, Xiamen University, Xiamen 361005, P R China

\* Corresponding authors:

\*E-mail: [ahli@xmu.edu.cn](mailto:ahli@xmu.edu.cn) (A. H. Li)

\*E-mail: [sunzj@xmu.edu.cn](mailto:sunzj@xmu.edu.cn) (Z. J. Sun)

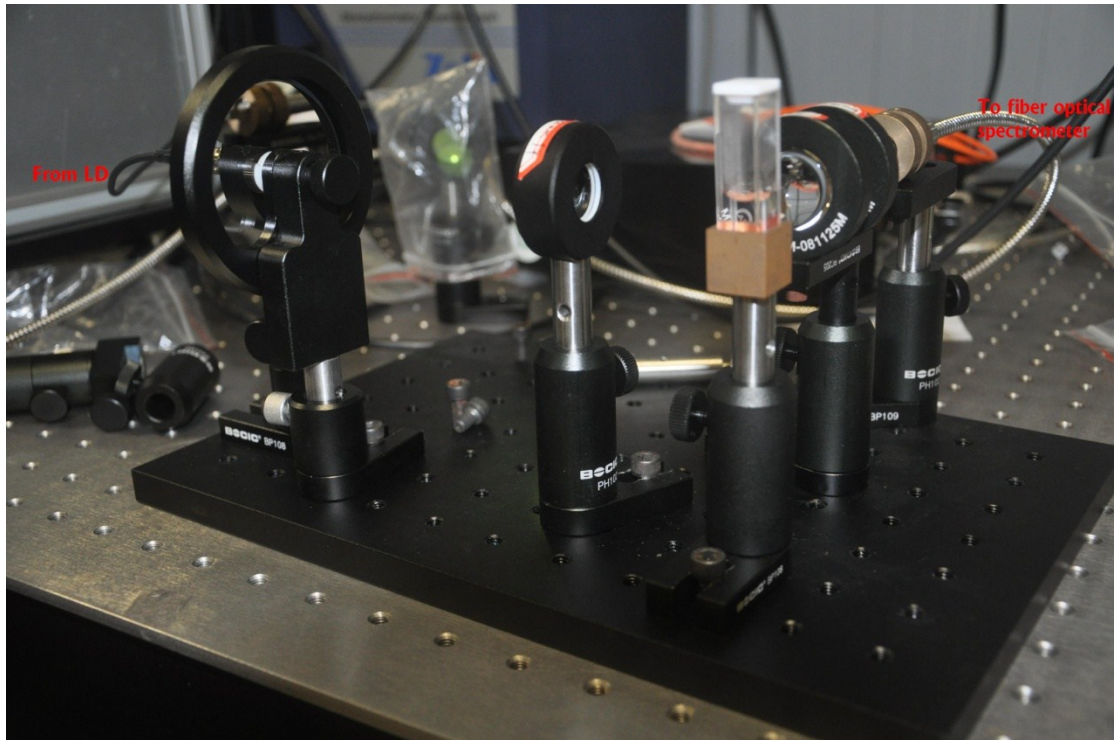

**Figure S1.** Optical path image of spectroscopic UCL measurement

### **Details about calculation of excitation light spot size**

When wheel of the chopper was placed on the position of excitation spot, the measured intensity of chopped LD was shown in **Figure S2**. By single exponential fitting of the decay part, fall time ( $\tau$ ) was extracted to be 43.4  $\mu\text{s}$ . Distance ( $r$ ) of the light spot to shaft of the wheel was 4.5 cm, rotational speed of the wheel was 49.5 round per second (99 Hz for 2-slot wheel), the following relationship would be

satisfied,

$$\frac{D}{2\pi r} = \frac{\tau}{T}$$

$D$  is diameter of the light spot,  $T$  is time cost by wheel to rotate one round, which is

$1/49.5$  s, so  $D \approx 0.06$  cm.

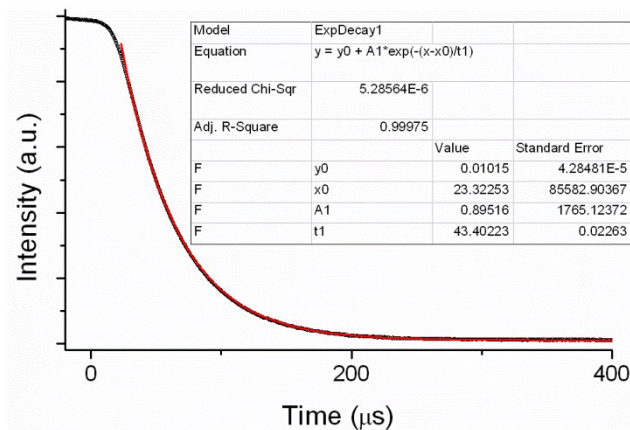

**Figure S2.** Chopped LD intensity *versus* time

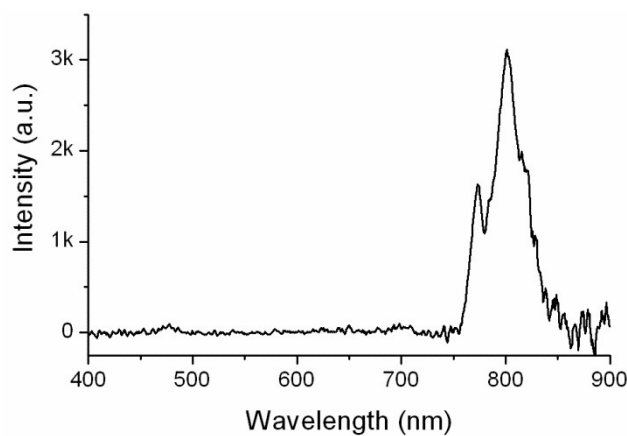

**Figure S3.** UCL spectrum of core-shell  $\text{SrF}_2:\text{Yb,Tm}@\text{CaF}_2:\text{Gd}$  nanoparticles' aqueous colloidal dispersion with concentration of 2.6 wt% under  $8.8 \text{ W/cm}^2$  LD excitation at 975 nm

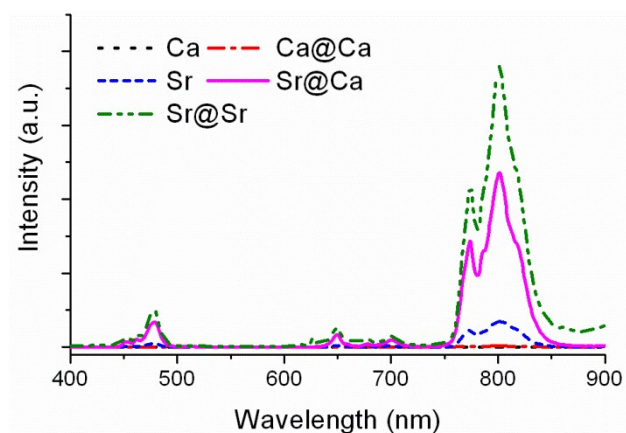

**Figure S4.** UCL spectra of samples with the same amount (10 mg sample/mL solvent) in the colloidal dispersions

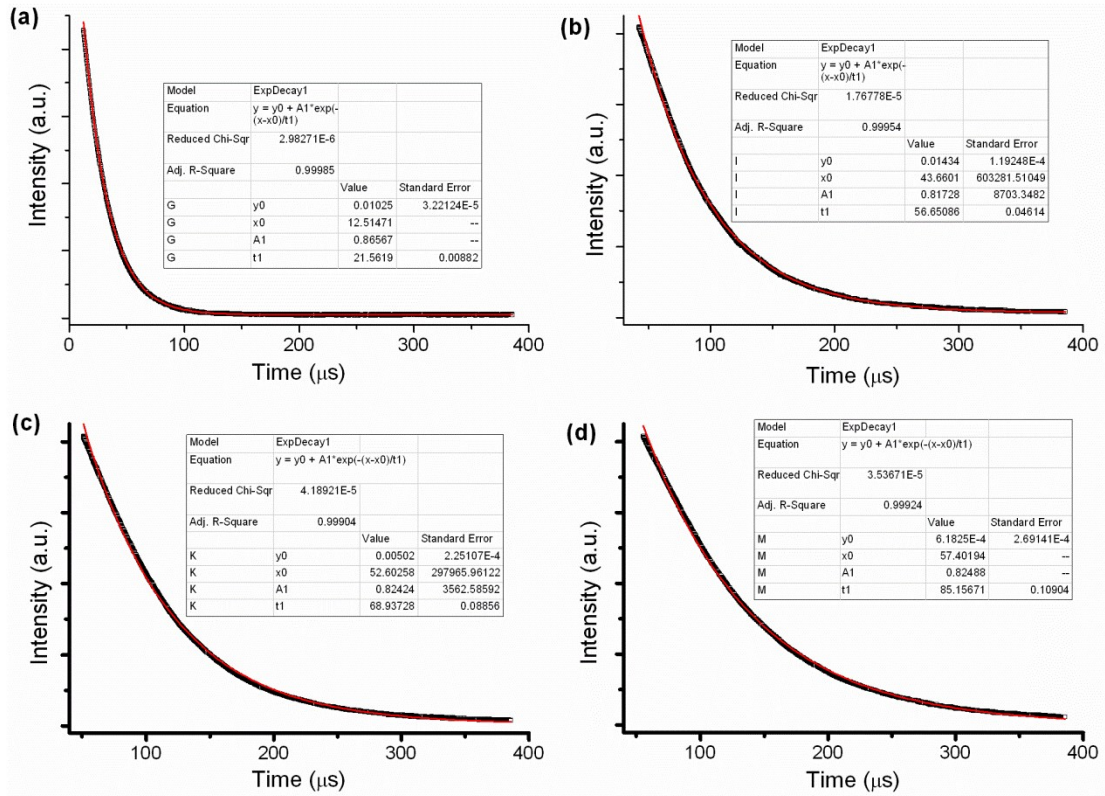

**Figure S5.** Single exponential fittings to the decay part of Figure 2(c). (a) chopped LD intensity, (b) SrF<sub>2</sub>:Yb,Tm, (c) SrF<sub>2</sub>:Yb,Tm@CaF<sub>2</sub>:Gd, (d) SrF<sub>2</sub>:Yb,Tm@SrF<sub>2</sub>:Gd

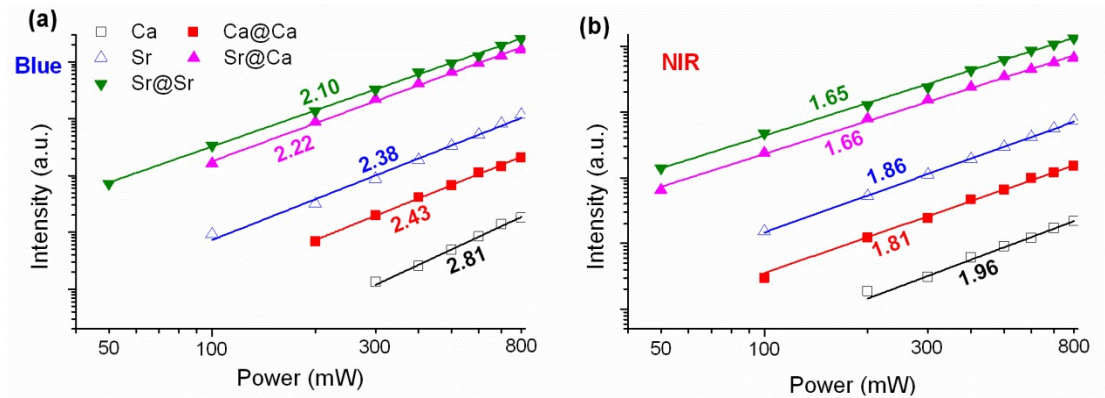

**Figure S6.** Power dependence of five samples in colloidal dispersions under 975-nm LD excitation
